# Supplementary material
Source: Springer Nature journal article supplement (https://www.springermedizin.de/resource/supplementary/12911_2011_625_MOESM1_ESM.pdf/9525926)

Brainstorming  
(n = 54)

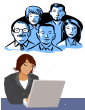

Sorting & Rating  
(n = 22)

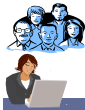

Interpretation  
(n = 11)

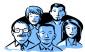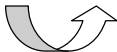

*Consolidation of  
196 statements*

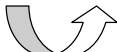

*Multidimensional scaling &  
Hierarchical cluster analysis*

Face-to-face

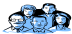

; Online

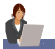

Supplement: MOESM1 [file 9525926]
